# Supplementary material for: Genome-wide identification and analysis of epithelial-mesenchymal transition-related RNA-binding proteins and alternative splicing in a human breast cancer cell line
Source: Springer Nature journal article supplement (doi:10.1038/s41598-024-62681-0), 2024-05-23
Supplement: MOESM1 [file 41598_2024_62681_MOESM1_ESM.pdf]

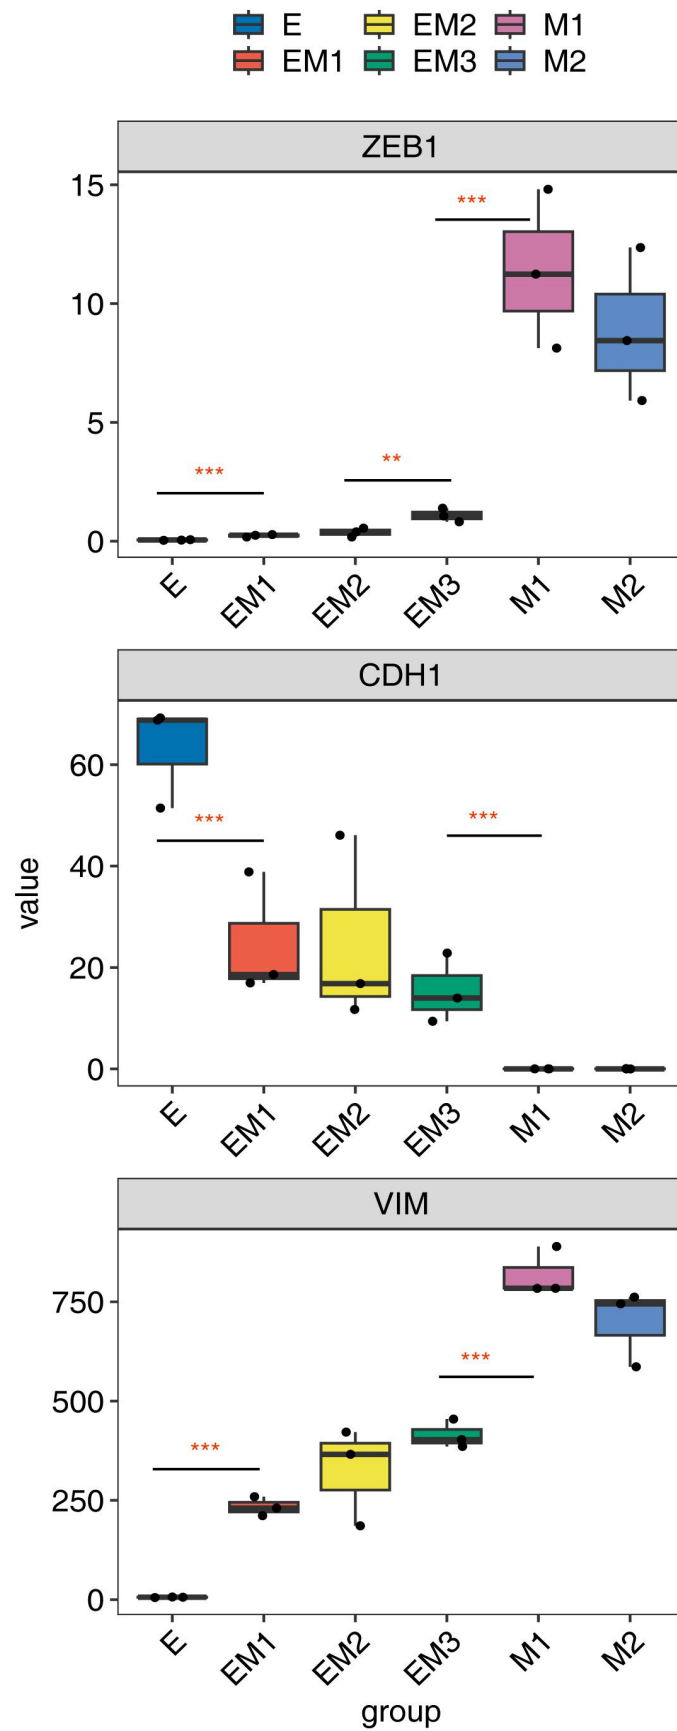

Figure S1. Expression amounts of EMT markers in a breast cancer cell line
